# Supplementary material for: Phospholipid-Conjugated PEG-b-PCL Copolymers as Precursors of Micellar Vehicles for Amphotericin B
Source: MDPI journal article supplement (doi:10.3390/polym13111747), 2021-05-27
Supplement: s1 [file s1]

# Phospholipid-conjugated PEG-b-PCL copolymers as precursors of micellar vehicles for Amphotericin B

Elsa R. Arias, Angie Angarita-Villamizar, Yolima Baena, Claudia Parra-Giraldo and Leon D. Perez

**Table 1.** Fitting parameters for the second release stage.

| Model                   | Parameter       | PP6          | PP3    | PP6-DSPE | PP3-DSPE | PEG-DSPE |
|-------------------------|-----------------|--------------|--------|----------|----------|----------|
|                         |                 | 24 h – 100 h |        |          |          |          |
| <b>Orden 0</b>          | R <sup>2</sup>  | 0,957        | 0,959  | 0,964    | 0,986    | 0,962    |
|                         | Ko              | 0,116        | 0,101  | 0,147    | 0,123    | 0,299    |
| <b>Orden 1</b>          | R <sup>2</sup>  | 0,971        | 0,958  | 0,951    | 0,986    | 0,938    |
|                         | k               | 0,003        | 0,003  | 0,006    | 0,006    | 0,006    |
| <b>Korsmeyer-Peppas</b> | R <sup>2</sup>  | 0,873        | 0,902  | 0,981    | 0,943    | 0,995    |
|                         | k <sub>KP</sub> | 0,570        | 0,636  | 0,956    | 0,977    | 0,743    |
|                         | n               | 0,170        | 0,172  | 0,312    | 0,287    | 0,345    |
| <b>Higuchi</b>          | R <sup>2</sup>  | 0,910        | 0,938  | 0,980    | 0,966    | 0,989    |
|                         | k <sub>H</sub>  | 0,017        | 0,015  | 0,022    | 0,018    | 0,045    |
| <b>Hixson Crowell</b>   | R <sup>2</sup>  | 0,952        | 0,959  | 0,966    | 0,986    | 0,974    |
|                         | k <sub>HC</sub> | 0,0005       | 0,0004 | 0,0006   | 0,0005   | 0,0016   |
| <b>Baker-Lonsdale</b>   | R <sup>2</sup>  | 0,972        | 0,958  | 0,952    | 0,986    | 0,923    |
|                         | k <sub>BL</sub> | 0,0005       | 0,0005 | 0,0008   | 0,0008   | 0,0008   |

**Table 2.** Similarity analysis.

| Formulation pair      | f <sub>2</sub> parameter |
|-----------------------|--------------------------|
| PP6 and PP3           | 74,8                     |
| PP6 and PP6-DSPE      | 58,8                     |
| PP3 and PP6-DSPE      | 69,1                     |
| PP3 and PP3-DSPE      | 58,9                     |
| PP6-DSPE and PP3-DSPE | 75,5                     |
| PP6-DSPE and PEG-DSPE | 37,9                     |
| PP3-DSPE and PEG-DSPE | 34,6                     |

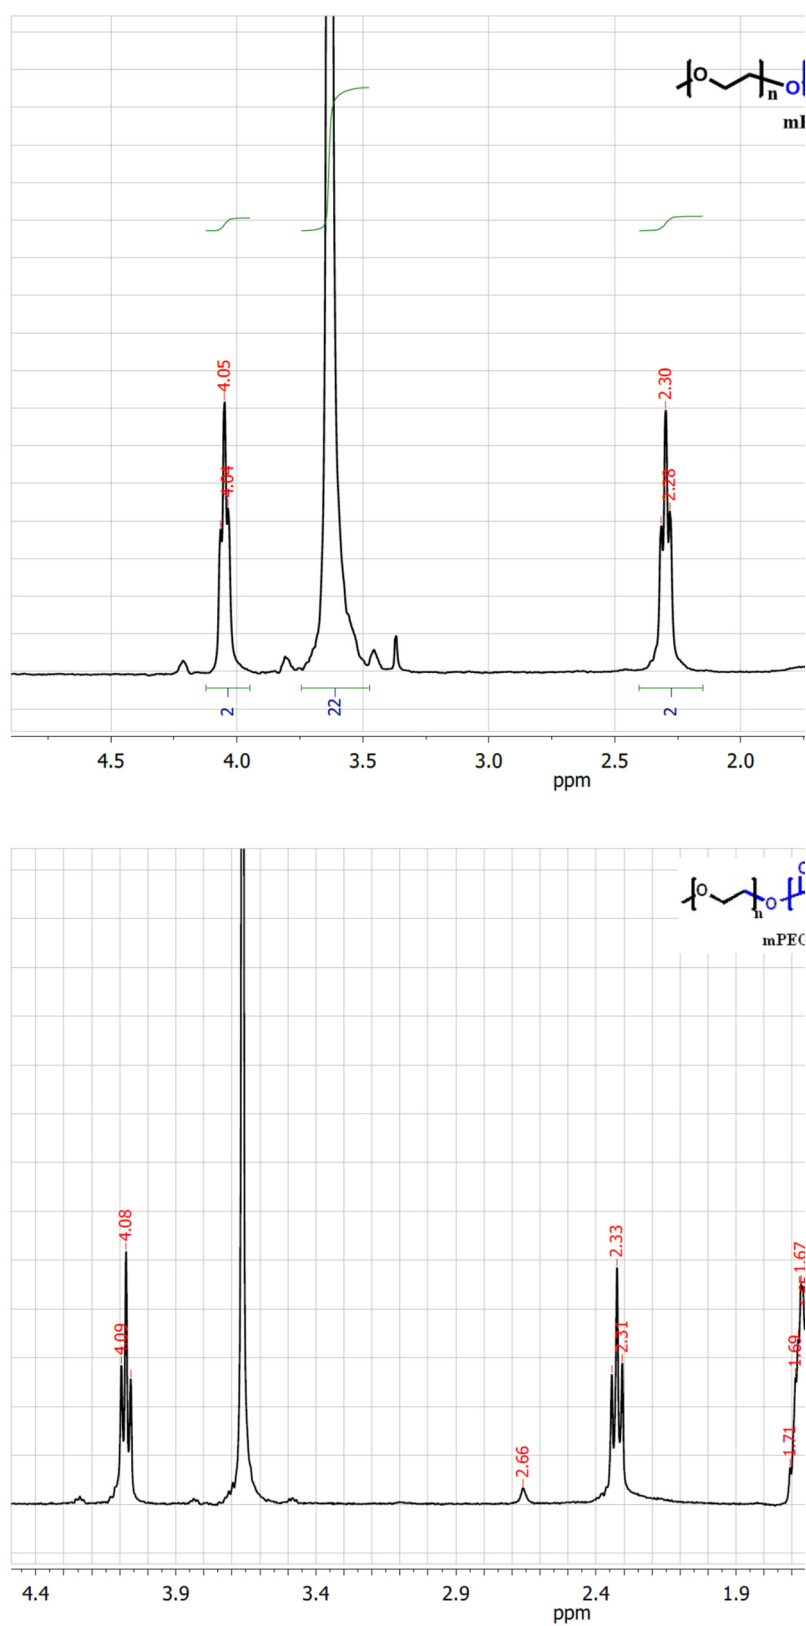

**Figure S1.**  $^1\text{H}$ -NMR spectra of (a) PP3 and (b) PP3-Succinic acid copolymers.

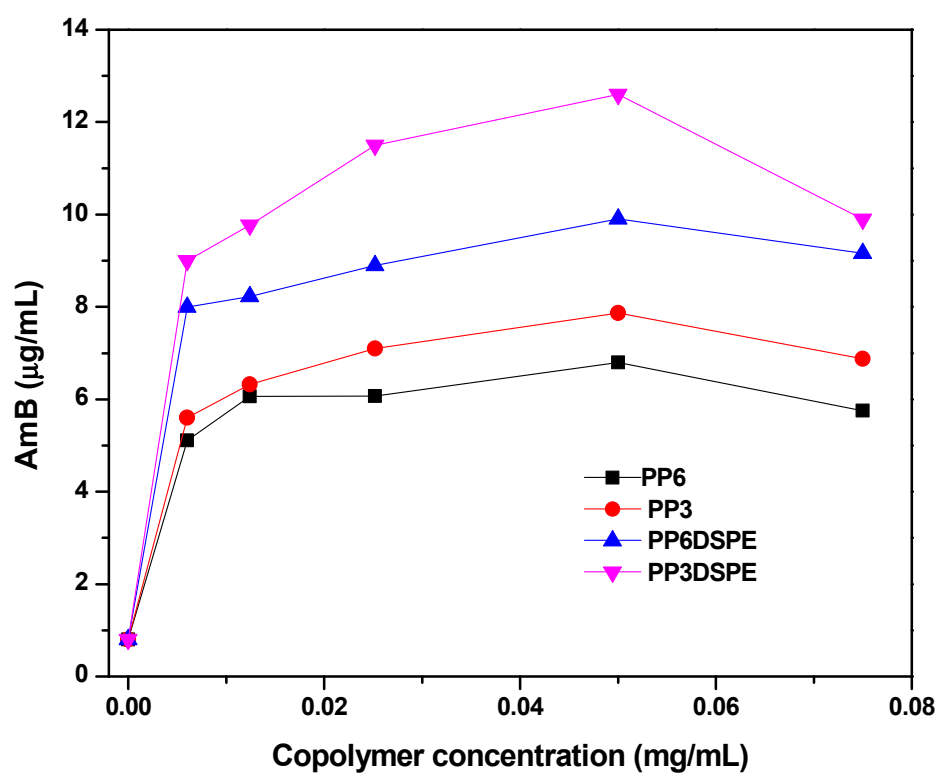

Figure S2. Solubility profiles of AmB in the presence of copolymers.

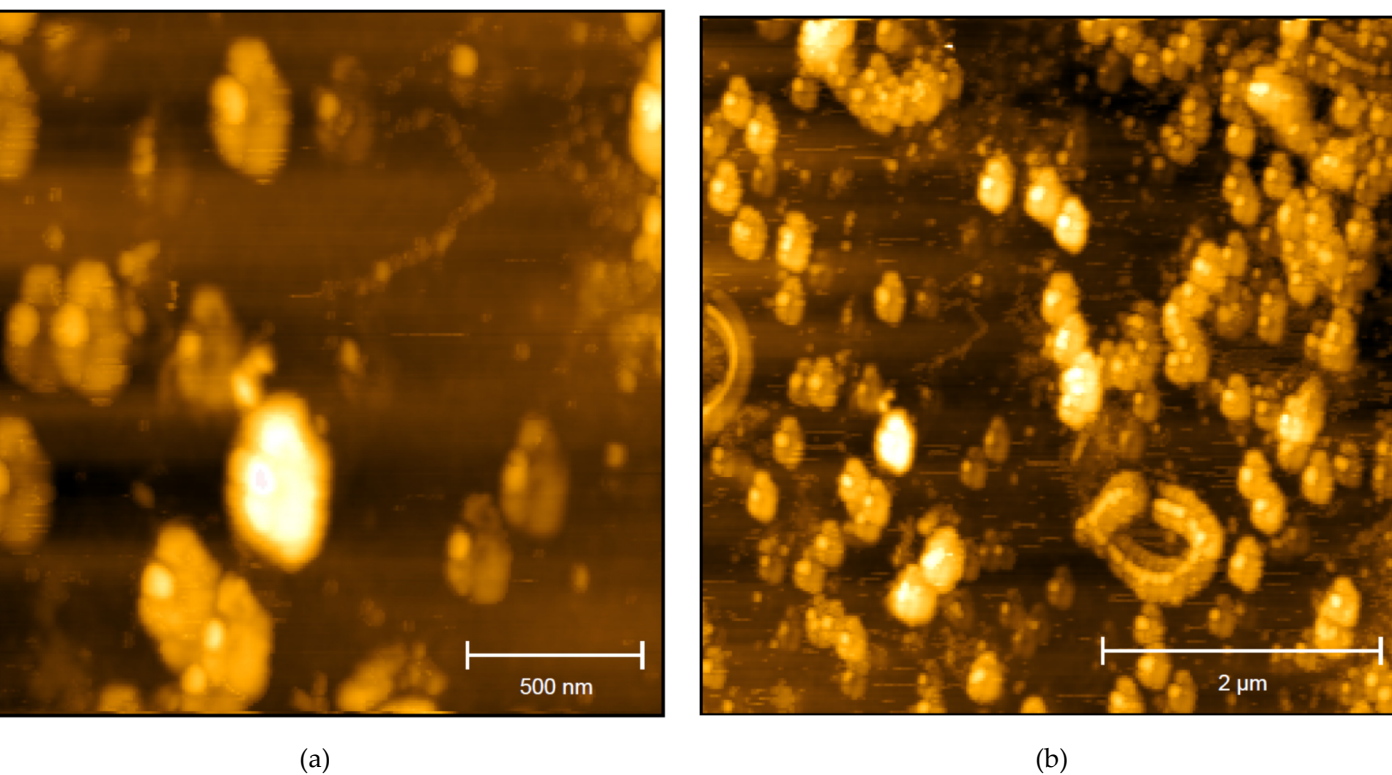

**Figure S3.** AFM images for representative samples Amb/PP3 (a) and Amb/PP3-DSPE (b).
